# Factors shaping vaginal microbiota community long-term dynamics

Tsukushi Kamiya<sup>1,\*</sup>, Nicolas Tessandier<sup>1</sup>, Baptiste Elie<sup>1,3</sup>, Claire Bernat<sup>3,4</sup>, Vanina Boué<sup>2</sup>, Sophie Grasset<sup>2</sup>, Soraya Groc<sup>2,3</sup>, Massilva Rahmoun<sup>3</sup>, Christian Selinger<sup>2,5</sup>, Michael S. Humphrys<sup>6</sup>, Marine Bonneau<sup>7</sup>, Christelle Graf<sup>7</sup>, Vincent Foulongne<sup>3</sup>, Jacques Reynes<sup>8</sup>, Vincent Tribout<sup>8</sup>, Michel Segondy<sup>3</sup>, Nathalie Boulle<sup>3</sup>, Jacques Ravel<sup>6</sup>, Carmen Lía Murall<sup>2,9</sup>, and Samuel Alizon<sup>1,2,\*</sup>

<sup>1</sup>Center for Interdisciplinary Research in Biology (CIRB), Collège de France, CNRS, INSERM, Université PSL, Paris, France

<sup>2</sup>MIVEGEC, CNRS, IRD, Université de Montpellier, France

<sup>3</sup>Institut de Génomique Fonctionnelle, Université de Montpellier, CNRS, INSERM, Montpellier, France.

<sup>4</sup>PCCEI, Univ. Montpellier, Inserm, EFS, Montpellier, France

<sup>5</sup>Swiss Tropical and Public Health Institute, Basel, Switzerland

<sup>6</sup>Institute for Genomic Sciences, University of Baltimore, USA

<sup>7</sup>Department of Obstetrics and Gynaecology, Centre Hospitalier Universitaire de Montpellier, Montpellier, France

<sup>8</sup>Department of Infectious and Tropical Diseases, Centre Hospitalier Universitaire de Montpellier, Montpellier, France

<sup>9</sup>National Microbiology Laboratory (NML), Public Health Agency of Canada (PHAC), Canada

\*Corresponding authors: [tsukushi.kamiya@college-de-france.fr](mailto:tsukushi.kamiya@college-de-france.fr),  
[samuel.alizon@college-de-france.fr](mailto:samuel.alizon@college-de-france.fr)

## Abstract

1

The vaginal microbiota is structured into five main community state types (CST) that  
are known to affect women’s health. CST shifts can occur in less than a day, but there  
is a lack of follow-ups lasting more than a few months; a gap in the knowledge that  
hampers our understanding of long-term dynamics. Analysing a longitudinal cohort of  
125 women followed for a median duration of 10 months, we show that ‘optimal’ (CST  
I, II, and V) or ‘sub-optimal’ CST III are more stable in time than the ‘non-optimal’  
CST IV. We also find that some probabilities of shifting from one CST to another are  
associated with covariates such reported number of sexual partners or alcohol consumption.  
Finally, we simulate population-level consequences of variations in behaviours. In addition  
to providing one of the first insights on vaginal microbiota dynamics over a year, along  
with a robust methodological analysis, these results open new perspectives to improve  
our mechanistic understanding of microbial interactions in the vaginal environment and  
develop new therapeutic strategies.

14

## Introduction

15

Epithelia of the human body are host to diverse arrays of microorganisms, referred to collectively as microbiota, that are tightly associated with our health. This is particularly true for the vaginal microbiota because its composition is strongly linked to the acquisition risk of many sexually transmitted infections (STIs) [1], fertility, especially in the context of medically-assisted procreation procedures [2], and general well-being [3].

16

17

18

19

20

Over the last two decades, meta-barcoding sequencing of 16S DNA revealed that the variations in vaginal microbiota, which traces back to Albert Döderlein in 1892, can be explained through five main community state types, or CSTs [4]. Three of these are referred to as ‘optimal’ and are dominated by a lactobacillus species (*L. crispatus* for CST I, *L. gasseri* for CST II, and *L. jensenii* for CST III). A fourth one, CST III, can be seen as ‘sub-optimal’ because it is dominated by *L. iners*, which is metabolically distinct from other lactobacilli and can be associated with pathologies [5]. Finally, CST IV is characterised by a diverse assemblage of other anaerobic bacterial species from the *Gardnerella*, *Prevotella*, or *Fannyhessea* genera. This latter CST is the one usually associated with diseases such as bacterial vaginosis [6]. Metagenomics and transcriptomics techniques have allowed us to refine the compositional structure of these CSTs and to better understand their functioning [7], yet a dynamical perspective is still starting to emerge.

21

22

23

24

25

26

27

28

29

30

31

32

The vaginal microbiota composition evolves through life [8] and daily variations have been scrutinised over a couple of months, with pioneering work analysing daily samples

33

34

during 16 weeks in 32 women [9]. While longer follow-ups exist, they either specifically 35  
focus on pregnancy [10, 11], the samples are taken at large intervals (typically more than 36  
three months) [12], or sample sizes are modest ( $< 100$ ) [13]. These circumstances limit the 37  
scope to generally understand the transient dynamics of vaginal microbiota in reproductive- 38  
aged women. Methodologically, many longitudinal studies aim to estimate the patterns of 39  
transitions and stability among distinct community types [10, 11, 14]. However, the lack 40  
of statistical power prevents these studies from examining how key risk factors modulate 41  
community transitions. Therefore, despite the inherently dynamic nature of vaginal micro- 42  
biota communities, the current understanding of the impacts of key covariates — including 43  
demography, lifestyle factors, sexual practices, or medication — relies almost entirely on 44  
cross-sectional studies [15]. As such, there exists a knowledge gap in factors responsible 45  
for stabilising and destabilising vaginal microbiota communities. 46

We explore vaginal microbiota long-term dynamics through a unique collection of 2,103 47  
samples, which provide us with a high-resolution longitudinal follow-up of 125 women 48  
over more than 10 months for each on average. We implement Bayesian Markov models 49  
to estimate transition probabilities between CSTs, simultaneously estimating associations 50  
between the transitions and relevant covariates. Our study offers a new insight into the 51  
stability and variability of the vaginal microbiota over a year and identifies important 52  
covariates that can explain the variation we witness in human populations. 53

## Results

54

### CSTs in the cohort

55

With 2,103 samples spanning over 1,323 total months of follow-up for 125 women, our longitudinal dataset from the PAPCLEAR cohort represents one of the longest analysed to date in the context of the vaginal microbiota (Figure 1). Study participants were between 18 and 25 years old at inclusion and additional characteristics are shown in Table 1. The majority of the samples (73.7%) were self-collected at home, the rest being collected upon on-site clinical visits, and the most common interval between analysed samples were seven and 14 days (Fig. 1a). The median follow-up duration was 8.64 (5.36, 14.0) months (Fig. 1b). On average, each participant contributed 11 samples (Fig. 1c).

The metabarcoding analysis on 16S RNA allowed us to assign each sample to a CST (see the Methods). These were variable across women and over time (Fig. 1d). CST I, II, and V are considered ‘optimal’ but the latter two are rare, so we pooled all three in further investigation and refer to them as ‘CST I(II, V)’. Overall, optimal communities were the most frequent, representing 44.5% of samples, followed by ‘sub-optimal’ (CST III) at 35.2% and ‘non-optimal’ communities (CST IV) at 20.4% (Fig. 1e).

### Probabilities of CST persistence

70

Given the longitudinal nature of our data, we used a continuous-time Markov model to model CST variations over time (see the Methods). Simulations based on the estimated

72

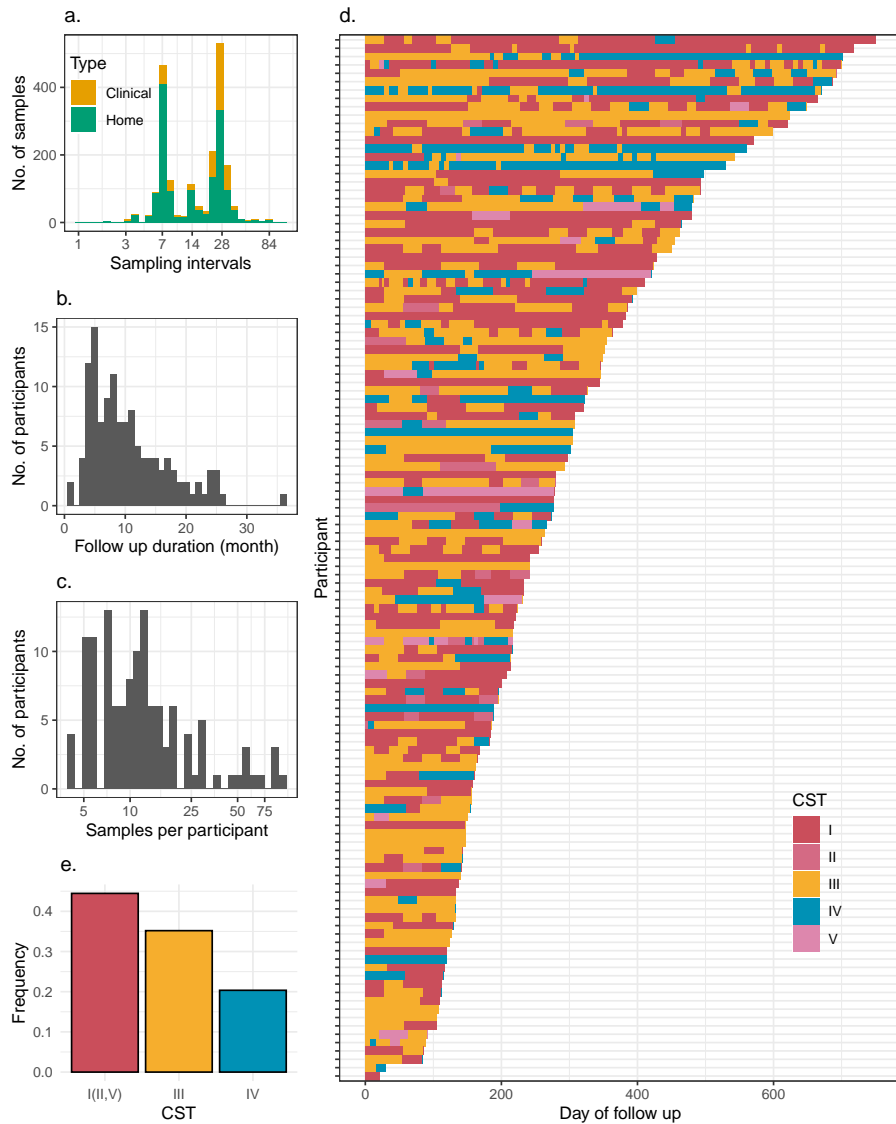

Figure 1: **Summary of vaginal microbiota samples analysed in the PAPCLEAR study.** a) Intervals between sampling events for on-site clinical and home samples. b) Follow-up duration per participant. c) Number of samples analysed per participant d) Vaginal microbiota Community State Types (CST) over time in 125 participants. e) Frequency of the optimal (CST I, II, and V), sub-optimal (CST III) and non-optimal (CST IV) communities in all samples.

parameters of our model (i.e., a posterior predictive check), confirmed that it accurately captures the observed CST prevalence (Fig. 2a). The optimal, CST I(II, V), and sub-optimal, CST III, communities showed a high degree of stability, with weekly probabilities to remain in the current state estimated at 87% (95% credibility interval, CrI, of 78 to 93%) and 81% (95% CrI of 68 to 90%), respectively. In contrast, the weekly persistence

Table 1: Summary profile of microbiota samples and covariates in the PAPCLEAR study. Q1 and Q3 refer to first (25%) and third (75%) quantiles. Level = 1 indicates the presence of a binary condition. See Appendix S1 for the covariate definitions.

|                                                       | Level    | Summary              |
|-------------------------------------------------------|----------|----------------------|
| Samples (Participants)                                |          | 2103 (125)           |
| CST (%)                                               | I(II,V)  | 935 (44.5)           |
|                                                       | III      | 740 (35.2)           |
|                                                       | IV       | 428 (20.4)           |
| Sample type (%)                                       | Clinical | 553 (26.3)           |
|                                                       | Home     | 1550 (73.7)          |
| Sampling interval (median (Q1,Q3))                    |          | 21 (7, 28)           |
| Follow-up duration (median (Q1,Q3))                   |          | 8.64 (5.36, 14.0)    |
| Samples per subject (median (Q1,Q3))                  |          | 11 (7, 16)           |
| <i>Covariates</i>                                     |          |                      |
| Identifying as ‘Caucasian’ (%)                        | 1        | 102 (81.6)           |
| BMI (median (Q1,Q3))                                  |          | 21.19 (19.78, 23.46) |
| Alcohol (median (Q1,Q3))                              |          | 3.14 (1.40, 5.07)    |
| Smoker (%)                                            | 1        | 36 (28.8)            |
| Stress level (from 0 to 3, median (Q1,Q3))            |          | 1.41 (1.00, 1.75)    |
| Regular sport practice (%)                            | 1        | 61 (48.8)            |
| Red meat consumption (times per week, median (Q1,Q3)) |          | 0.50 (0.16, 1.00)    |
| Years since 1st menstruations (median (Q1,Q3))        |          | 9 (7, 10)            |
| Hormonal contraception (%)                            | 1        | 32 (25.6)            |
| Menstrual cup user (%)                                | 1        | 46 (36.8)            |
| Vaginal product user (%)                              | 1        | 73 (58.4)            |
| Tampon user (%)                                       | 1        | 89 (71.2)            |
| Lifetime number of partners (median (Q1,Q3))          |          | 5 (3, 11)            |
| Lubricant use (%)                                     | 1        | 58 (46.4)            |
| Regular condom use by partner (%)                     | 1        | 23 (18.4)            |
| Male affinity (%)                                     | 1        | 124 (99.2)           |
| Chlamydia infection at inclusion (%)                  | 1        | 7 (5.6)              |
| Pregnancy during follow-up (%)                        | 1        | 4 (3.2)              |
| Vaginal douching (%)                                  | 1        | 4 (3.2)              |
| Spermicide user (%)                                   | 1        | 1 (0.8)              |
| Female affinity (%)                                   | 1        | 10 (8.0)             |
| Systemic antibiotic treatment during the study (%)    | 1        | 65 (52.0)            |
| Genital antibiotic treatment during the study (%)     | 1        | 30 (24.0)            |

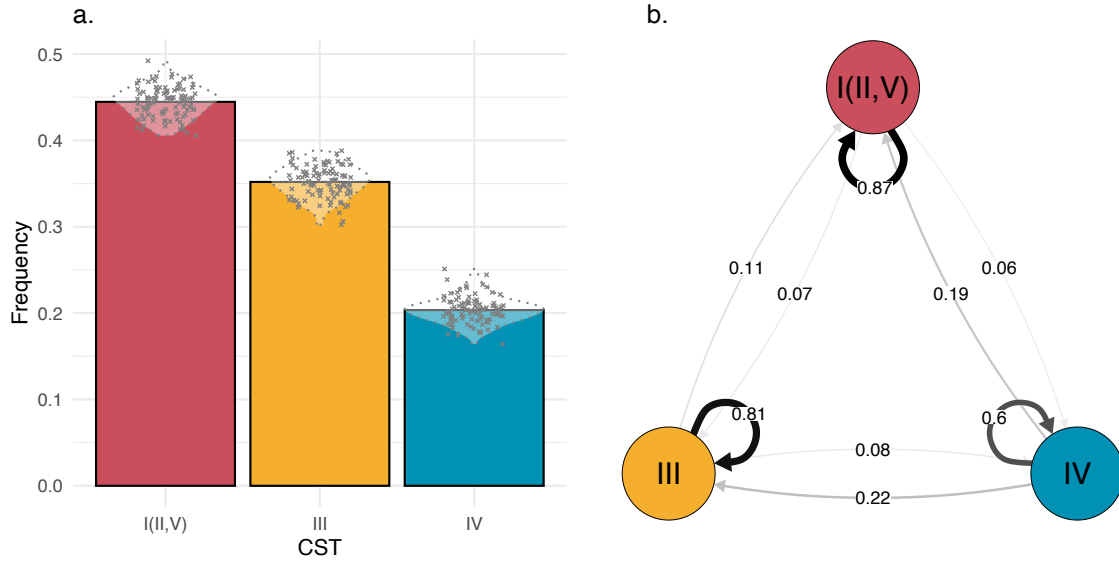

Figure 2: **Prevalence and transition probabilities among vaginal microbiota community state types (CSTs).** a. Observed (bars) and predicted prevalence (crosses) of CSTs I (II, V), III and IV. The model predictions were generated by drawing 100 random samplings from the posterior distributions and simulating the Markov model for each sampled parameter set. b) Mean estimated weekly transition probabilities of CSTs I (II, V), III and IV. The arrow thickness indicates the persistence or transition probability.

probability of the non-optimal CST IV was only 60% (95% CrI of 32 to 80%, Fig. 2b).

78

### Covariates effect on transitions

79

To gain a mechanistic understanding of the CST shifts, we estimate the effect of covariates

80

jointly with the transition probabilities. Focusing on 16 covariates of interest and assuming

81

that they have a symmetrical effect on CST transitions, we identified alcohol consumption

82

as the most consistent driver of vaginal microbiota communities as it favoured the sub-

83

optimal over the optimal community (with 98% certitude, Fig. 3). This means that alcohol

84



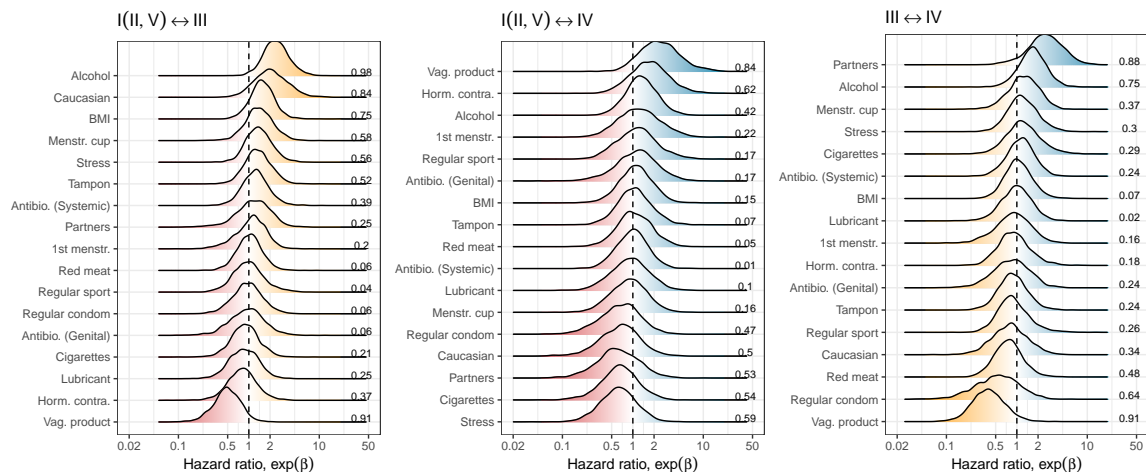

Figure 3: **Estimated covariate effects on community transition rates.** With the symmetry assumption, there are only three main types of transitions. The impact of covariates on community transition rates was estimated for a given set of community states as the log hazard ratio,  $\beta$ . The figure shows the posterior distributions of  $\exp(\beta)$ , the hazard ratio for the three sets of transition sets, and the corresponding 16 covariates. The numbers on the right-hand side of each panel indicate the probability that the estimated effect is different from the hazard ratio of 1 (i.e., the proportion of posterior distributions sampled on the dominant side of the effect).

consumption increases the pace of transition from CST I(II, V) to CST III or reduces that in 85  
the opposite direction by the same magnitude (our symmetry assumption does not allow 86  
us to distinguish between the two). In addition, alcohol consumption tended to favour 87  
CST IV over CST III (with 75% certitude, Fig. 3). 88

Other factors of possible effects on transitions (i.e., with more than 75% certitude) 89  
included self-reported Caucasian identity, number of sexual partners, use of vaginal intimate 90  
hygiene products, and body mass index (BMI). More precisely, identifying oneself as a 91  
‘Caucasian’ and having a larger BMI both appeared to favour CST III over CST I(II, V) 92

with 84 and 75% certitude, respectively. The number of sexual partners was also found to 93  
potentially favour CST IV over CST III, increasing the risk of maintaining (or transitioning 94  
to) CST IV with 88% certitude. 95

Finally, the use of vaginal hygiene products appeared to have multifaceted effects. 96  
Between CST I(II, V) and CST III, their use was positively linked to maintaining or 97  
transitioning to CST I(II, V) with 91% certitude. For the CST I(II, V) and CST IV pair, 98  
this product use tended to favour a shift towards CST IV, with an 84% certitude. Between 99  
CST III and CST IV, their use was more likely to support the persistence or move towards 100  
CST III, also with a 91% probability. These findings indicate that further mechanistic 101  
understanding of individual products marketed for ‘vaginal intimate hygiene’ is warranted. 102

### **Population-level consequence of covariate effects** 103

Analysing transition rates at the individual level can help guide more mechanistic studies 104  
at the within-host level, but they offer limited insights about population-level outcomes. 105  
This is particularly true for covariates that are strongly involved in more than one type 106  
of CST. Therefore, we performed simulations in which we varied a covariate while setting 107  
all other factors to their representative reference value. Thanks to our estimated hazard 108  
ratios (Fig. 3), we could predict the expected proportion of each CST in this simulated 109  
population. This allowed us to see that covariates such as the reported use of vaginal 110  
hygiene products, which are involved in many shits, appear to have a limited population 111  
effect, with only a slightly decreasing frequency of CST IV with more frequent usage. 112

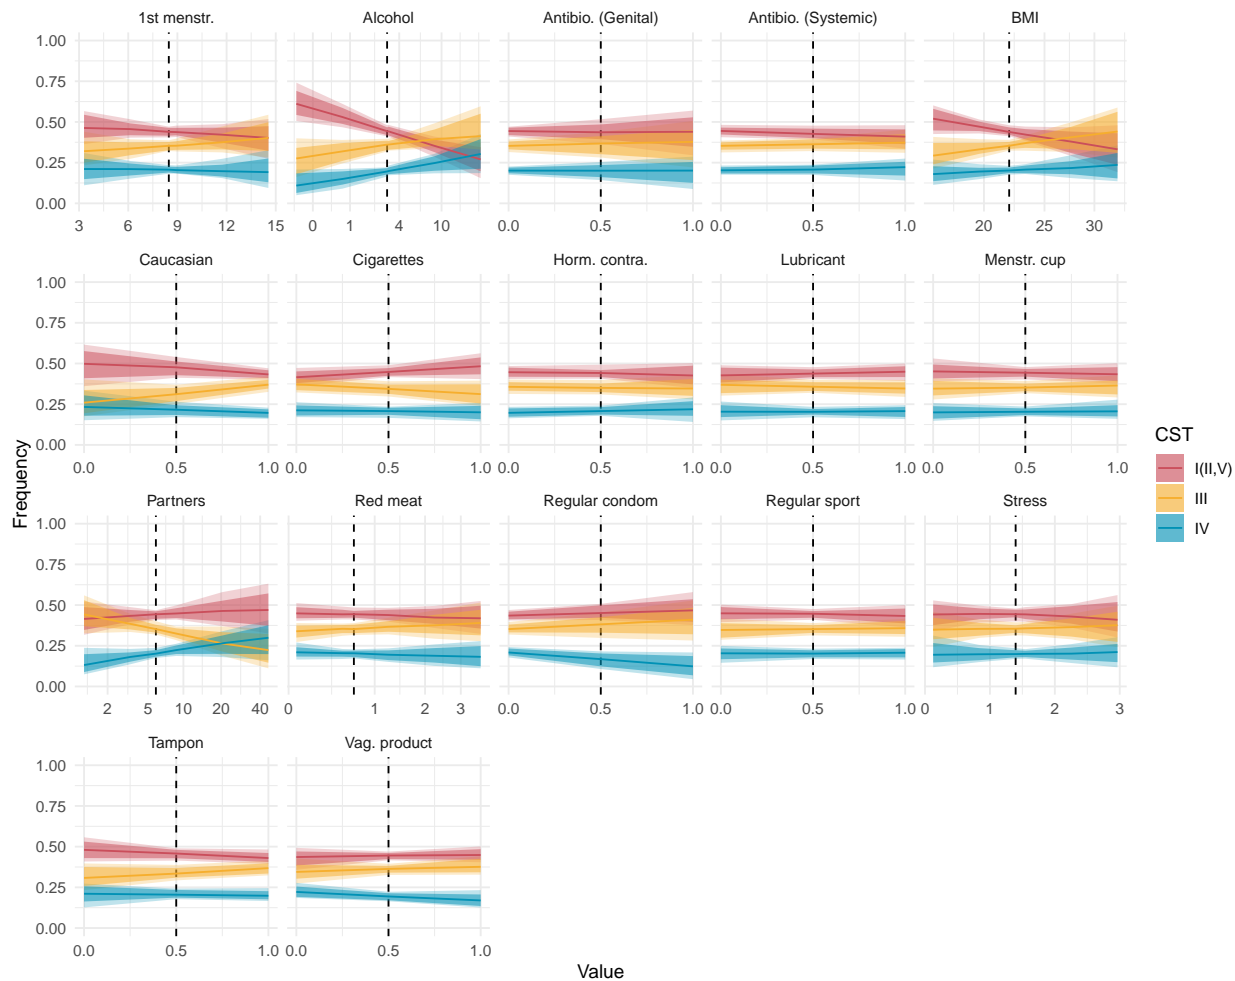

Figure 4: **Prevalence simulations predict population-level consequences of co-variates.** Based on estimated hazard ratios (Fig. 3), the population-level impact was simulated for each covariate. The vertical dashed lines indicate the intercept used in estimation: i.e., the population mean for continuous and 0.5 for binary variables. For continuous variables, the range of values explored was determined by the minimum and maximum values reported in the PAPCLEAR study .

Conversely, these simulations allowed us to confirm that the effect of alcohol on commu- 113  
 nity transition rates translates into a marked decline in CST I prevalence in favour of CST 114

III at the population level in our simulations (Fig. 4). Compared to the average alcohol 115  
consumer in this cohort, the predicted prevalence of the optimal community (CST I, II 116  
and V) was 17% higher and lower for non-drinkers and the heaviest drinkers in the cohort, 117  
respectively (>99% certitude). The alcohol-induced downfall of the optimal communities 118  
is accompanied by an increase in both the sub- and non-optimal communities, although the 119  
increasing trends are less certain separately. Nonetheless, the non-optimal CST IV tends 120  
to be 11% (>88% certitude) higher among average drinkers than non-drinkers. 121

Finally, as expected from the transition rates, population-level simulations predict that 122  
an increasing number of sexual partners tends to reduce the prevalence of the sub-optimal 123  
CST III with up to 92% certitude in favour of non-optimal CST IV (with up to 84% certi- 124  
tude). Perceived ethnic identity also hinted at trends at the population level as participants 125  
who identified as ‘Caucasian’ were estimated to show an 11% higher occurrence of CST III 126  
(with 84% certitude). We also find that CST IV (non-optimal) communities tend to be 127  
less frequent in regular condom users (8% lower prevalence with 88% certitude), which is 128  
consistent with previous association studies [16–18]. 129

### **Unobserved individual variability in community transition** 130

While we incorporated 16 covariates into our model, some variations among women remain 131  
unaccounted for. To quantify these, we estimated the extent of individual variability (i.e., 132  
unobserved heterogeneity) in community transitions for each transition pair. 133

The highest variability was observed among women in the transitions involving ‘recov- 134

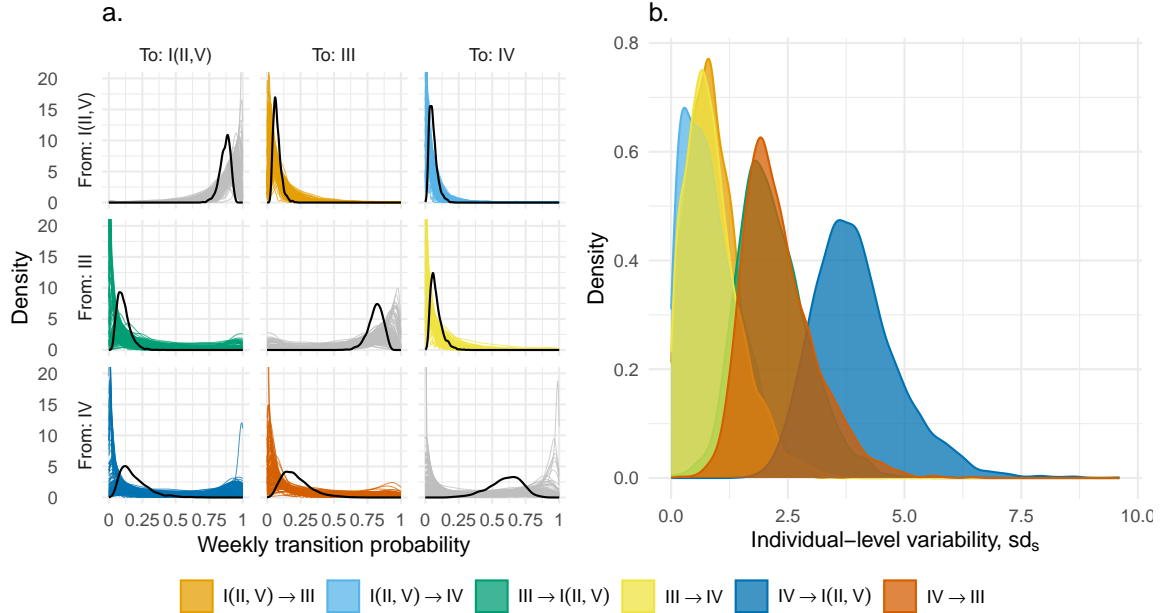

Figure 5: **Individual-level variability in vaginal microbiota community state type transitions.** a) The population average (thick black) and individual (thinner colours) weekly transition probabilities. b) Between-women individual variation for different transition combinations. Colours indicate the type of transition between CSTs.

ery' to an optimal CST from CST IV (Fig. 5). On the other hand, inverse transitions 135  
 exhibited some of the lowest individual variability. The same is true, although to a lesser 136  
 extent, for the shifts from sub-optimal CST III to optimal CSTs. 137

These results suggest that there are limited pathways leading to the deterioration of 138  
 vaginal microbiota communities, whereas the routes to recovery can be highly individu- 139  
 alised. As these variations remained unexplained by the 16 covariates we investigated, 140  
 further research attention is warranted to better understand the diversity of microbiota 141  
 recovery trajectory. 142

## Discussion

143

Vaginal microbiota is a key component of women’s health. Pioneer work has studied its 144  
daily variations for up to 16 weeks [9], but longer-term dynamics remain largely unknown. 145  
By analysing follow-ups in 125 women with unprecedented length (more than 10 months 146  
on average and more than 16 samples per participant), we estimate the probabilities to 147  
shift from one CST to another. These are consistent with the ones from earlier studies, 148  
especially with a model that included the data from four cohorts [14]. Interestingly, in a 149  
cohort following pregnant women, CST I was found to be more stable than in ours, which 150  
could be due to hormonal changes [10]. 151

We also succeeded in testing the effect of relevant covariates on these transition rates, 152  
while estimating them, which represents a strong methodological advance. We identify 153  
several covariates with strong effects, some of which are echo earlier studies. For example, 154  
the association between CST IV and the number of partners is consistent with the hypoth- 155  
esis that external importation of microbes could alter the dynamics of vaginal microbiota 156  
and in line with earlier work []. The same is true for our result that (non-optimal) CST 157  
IV tends to be less frequent in regular condom users, which is consistent with previous 158  
association studies [16–18]. 159

Our study represents a rare European long-term cohort, yet it does not support a 160  
balanced design concerning ethnicity with over 80% of participants representing the Cau- 161  
casian identity (Table 1). We do find that participants who do not identify themselves as 162

Caucasian are less found in CST I is consistent with many studies showing associations 163  
between self-perceived ethnicity and CST [4, 19, 20]. As the relative importance of biolog- 164  
ical, societal and environmental factors remains an open question [18], further studies are 165  
warranted to investigate in Europe. 166

The reported use of products for vaginal hygiene (e.g. intimate soap) appears to have 167  
an effect on several transitions, which makes it difficult to link to a CST in particular. 168  
Finally, one of the strongest associations we find is between the amount of self-reported 169  
alcohol consumption and CST III. There are reports that go in this direction but, generally, 170  
there is little data on the link between diet and CST. 171

Strikingly, antibiotic consumption had little effect on CST transitions. This was true 172  
for local treatment (genital application of metronidazole) or system treatment (antibiotic 173  
treatment via oral intake). The strongest signal was between systemic use and CST III, 174  
which is consistent with existing literature. An interpretation of this result is that CST 175  
dynamics can be fast, as shown by daily monitoring. Therefore, since our sampling is 176  
typically independent from treatment, CSTs are likely to have returned to a more basal 177  
state when sampled. 178

These results have limitations. One of these is that, for our model to achieve conver- 179  
gence, we had to assume symmetry in the transition risks. This means that for alcohol 180  
consumption, for example, we do not know whether it increases the risk to shift away 181  
from an optimal CST or decreases the likelihood of leaving a sub-optimal CST. Another 182  
limitation inherent to all these studies is that even if we included many covariates, these 183

patterns could be explained by ‘hidden variables’ or participants’ general lifestyles. 184

Our model outputs, especially the inspection of the random effects, indicate that a 185  
large part of the variability remains to be explained. One possibility could be that we miss 186  
important covariates. Another could be that the CSTs classification level is too coarse. Fu- 187  
ture studies could analyse sub-CSTs, but this would greatly increase the number of possible 188  
transitions, thereby raising an acute statistical challenge (here we already had to collapse 189  
CSTs I, II, and V to introduce covariates into the model). In the same vein, analysing 190  
metagenomics data could provide additional valuable insights on vaginal microbiota long- 191  
term dynamics [21]. For example, for women who appear to have stable CSTs, we could 192  
identify the proportion of lineage replacements. This would also allow us to investigate the 193  
effect of antibiotic treatments on the prevalence of resistance genes in the metagenome. 194

Finally, a promising avenue for future studies would be to jointly analyse CST dynamics 195  
and sexually transmitted infections, especially human papillomaviruses (HPV). Earlier 196  
studies have found a weak association between CST IV and the risk of HPV detection [22] 197  
but the CST effect was tested after estimating transition rates and, more importantly, 198  
this study pooled all high-risk HPV and all low-risk HPVs, making it difficult to identify 199  
coinfections or reinfections. The PAPCLEAR cohort having genotype-specific follow-ups 200  
[23], it could provide new insights into the link between CST and HPV infection, while 201  
even identifying causal relationships. 202



## Material and methods 203

### Longitudinal clinical data 204

Samples originate from the PAPCLEAR monocentric longitudinal cohort study, which 205  
followed  $N = 149$  women longitudinally between 2016 and 2020. Its inclusion criteria were 206  
to be between 18 and 25 years old, to live in the area of Montpellier, France, to be in good 207  
health (no chronic disease), not to have a history of HPV infection (e.g., genital warts or 208  
high-grade cervical lesion), and to report at least one new sexual partner over the last 12 209  
months. Additional details about the protocol can be found elsewhere [24]. 210

Participants were enrolled by putting up posters and handing out leaflets at the main 211  
sexually transmitted infection detection centre (CeGIDD) within the University Hospital 212  
of Montpellier (CHU) and in the Universities of the city. To increase enrolment, posters 213  
were also hung at bus stops near the CHU. 214

The inclusion visit was performed by a gynaecologist or a midwife at the CeGIDD 215  
outside operating hours. After an interview, several samples were collected, including 216  
vaginal swabs with eSwabs (Coppan) in Amies preservation medium. The samples were 217  
aliquoted right after the visit and stored at  $-20^{\circ}\text{C}$ , before being transferred at  $-70^{\circ}\text{C}$  within 218  
a month. Participants also filled in a detailed questionnaire, which formed the basis of 219  
epidemiological covariates analysed in this study. 220

Subsequent clinical visits were scheduled every 2 or 4 months, depending on the HPV 221  
status. Between two visits, women were asked to perform 8 self-samples at home with 222

eSwabs in Amies medium and to keep them in their freezer. Samples were brought back 223  
in an isotherm bag at the next visit. These were stored with the swab at -70°C until 224  
processing. 225

## Microbiota metabarcoding and quantification 226

The microbiota metabarcoding was performed on 200µL of vaginal swabs specimen stored 227  
at -70° in Amies medium. The DNA extraction was performed using the MagAttract 228  
PowerMicrobiome DNA/RNA Kit (Qiagen). Next-generation sequencing of the V3-V4 229  
region of the 16S gene [25] was performed on an Illumina HiSeq 4000 platform (150 bp 230  
paired-end mode) at the Genomic Resource Center at the University of Maryland School 231  
of Medicine. 232

The taxonomic assignment was performed using the internal software package Speci- 233  
ateIT (<https://github.com/Ravel-Laboratory/speciateIT>) and the community state 234  
type was determined using the VALENCIA software package [26]. 235

## Covariates 236

In the PAPCLEAR study, questionnaires were given to each participant to record patient- 237  
level meta-data. In Supplementary Methods, we outline these variables with a variable 238  
label (in italics), brief description and relevance for the vaginal environment. 239

Out of the 22 covariates initially considered, we excluded six (*Chlamydia*, *Female* 240  
*affinity*, *Male affinity*, *Pregnancy*, *Spermicide* and *Vag. douching*) as data were severely 241

skewed towards the most common value (> 90% of data). All these covariates are time- 242  
homogeneous meaning that the variation is among women, and static through time. To 243  
facilitate the comparison of covariate effects, we centred and scaled continuous variables [27] 244  
and deviation-coded binary variables. These transformations ensure that all covariates are 245  
modelled in a comparable scale and the intercept is located at a “representative refer- 246  
ence value” of the modelled population. Four continuous covariates (i.e., *Alcohol*, *BMI*, 247  
*Partners*, and *Red meat*) were log-transformed before scaling due to their right-skewed 248  
distribution. 249

During their follow-ups, any use of medication was listed by the study staff. Within 250  
these, we identified antibiotic treatments and separated the ones corresponding to ‘Gyne- 251  
cological anti-infectives and antiseptics’ (‘G01’ ATC codes), which all consisted in metron- 252  
idazole treatments, to those corresponding to ‘Antibacterials for systemic use’ (‘J01’ ATC 253  
codes), which were more diverse in terms of molecules. Since we had the exact dates of 254  
treatment, these could be included as time-varying covariates into the model. 255

## **The model**

 256

### **Markov modelling**

 257

Markov models are statistical models used to represent systems that transition between 258  
discrete states over time. These models are said to be ‘memoryless’, meaning that the 259  
probability of transition to another state depends on the current state, but not its historical 260

path. In clinical research, these models are often used to predict the transitions among 261  
health states (e.g., health, illness and remission), and the propensity to transition between 262  
these states is estimated from longitudinal follow-up data. Because the exact timing of 263  
these transitions is rarely known, clinical follow-up data are typically modelled using the 264  
continuous-time Markov model [28], in which the probability of transition over a given 265  
interval depends on the instantaneous transition intensity and the amount of time spent 266  
in the current state. 267

### Transition intensities 268

Transition intensities refer to the instantaneous rate of moving from state  $i$  to state  $j$ , a 269  
process that may be affected by a vector of covariates,  $X$ . Taking the form of a proportional 270  
hazards model, these rates can be expressed as: 271

$$q_{p,i,j} = \text{Exp}(\mu_{p,i,j} + \beta_{i,j} X), \quad (1)$$

where  $\mu_{p,i,j}$  is the log-intercept, i.e. the baseline when all covariates are 0, and  $\beta_{i,j}$  is 272  
the log-coefficient expressing the impact of a covariate(s). This intercept is further defined 273  
by the equation 274

$$\mu_{p,i,j} = (\hat{\mu}_{i,j} + s_{p,i,j}) \cdot \mu_{sd} + \bar{\mu}, \quad (2)$$

where  $\bar{\mu}$  and  $\mu_{sd}$  are the prior mean and standard deviation of the log-intercept such 275  
that  $\hat{\mu}_{i,j} \cdot \mu_{sd} + \bar{\mu}$  constitutes the non-centred parameterisation of the population-level 276  
intercept,  $\mu_{i,j}$  and is assumed to be normally distributed, i.e.,  $\hat{\mu}_{i,j} \sim \mathcal{N}(0, 1)$ . 277

Additionally, we allow for unobserved heterogeneity in  $\mu$ , i.e.,  $s_{p,i,j}$ , where 278

$$\mathbf{s} = \text{diag}(\mathbf{sd}_s) \cdot \mathbf{L}_s \cdot \mathbf{z}_s. \quad (3)$$

We sample from the corresponding weakly informative priors, namely  $sd_s \sim t_4(0, 1)$ , 279  
 $L_s \sim \text{LKJCorrCholesky}(2)$ , and  $z_s \sim \mathcal{N}(0, 1)$ , as recommended by the Stan development 280  
community [29, 30]. 281

For regression coefficients, the student-t distributions with degrees of freedom 4 to 7 are 282  
recommended as generic, weakly informative, priors [30]. We sampled  $\beta$  from  $\beta \sim t_4(0, 1)$ , 283  
which places a comparatively wide tail within the recommendation. As all of our covariates 284  
have been proposed to impact vaginal microbiota communities *a priori* (see above), we did 285  
not strongly regularise the priors, for example, through the use of the horseshoe priors [31]. 286  
We note that all covariates were modelled simultaneously such that the interpretation of 287

each coefficient is conditional upon other covariates included and accounts for the influence 288  
of other factors. We assumed that the covariates symmetrically affect the transitions (i.e., 289  
 $\beta_{j,i} = -\beta_{i,j}$ ), implying that the influence of any particular factor on moving from one 290  
community state to another remains consistent, regardless of the direction the transition. 291

Collectively, the transition intensities form the  $Q$  matrix, in which the sum of intensities 292  
across a row, i.e., all transitions from a particular state, is defined to be zero, such that we 293  
have the following equation for the diagonal entries: 294

$$q_{i,i} = - \sum_{j \neq i} q_{i,j}. \quad (4)$$

### Transition probabilities and likelihood 295

Taking the matrix exponential of the  $Q$  matrix for each participant, we compute the matrix 296  
 $P$  such that: 297

$$P = \text{Exp}((t_{k+1} - t_k) Q), \quad (5)$$

where  $k$  represents the sample identity for a given individual. The  $P$  matrix contains 298  
the transition probabilities between two observations (at  $k$  and  $k+1$ ) and  $t_{k+1} - t_k$  indicates 299  
the elapsed time between two observations. 300

Finally, the probability of observing a given state at the next sampling event (i.e. at  $k + 1$ ) is modelled by the categorical distribution:

$$y_{k+1} \sim \text{Categorical}(P[y_k,]) \tag{6}$$

where  $P[y_k,]$  is the  $y_k^{\text{th}}$  row of the  $P$  matrix containing the probabilities of transition from the state observed at  $k$ .

## Model fitting

We used a Bayesian approach to fit the above continuous-time Markov model to longitudinal data of vaginal microbiota CSTs. Our model was written in Stan 2.26.1 and fitted through the RStan interface 2.32.3 [32].

One participant lacked information on the years since their initial menstruation. We imputed missing values using the `mice` package [33] and generated 20 imputed datasets to be fitted separately. For each imputed dataset, we fitted the model in parallel using four independent chains, each with 2,000 sampled iterations and 1,000 warmup iterations. The MCMC samples from separate runs (i.e., based on differently imputed data) were subsequently combined for inference.

We confirmed over 4,000 combined effective samples and ensured convergence of independent chains ( $\hat{R} < 1.1$ ) for all parameters [34]. We carried out a posterior predictive

check by comparing the observed and predicted CST frequency. We also quantified the 317  
posterior  $z$ -score and posterior contraction to examine the accuracy and precision of pos- 318  
terior distributions and the relative strength of data to prior information [35] (Supporting 319  
Information S1). 320

## Counterfactual predictions 321

We took advantage of the parameterised model to simulate the population-level outcomes 322  
of each covariate, assuming that all covariates, but a focal one, are at the representative 323  
reference value (as described above) and then varying the focal parameter within the range 324  
of values observed in the studied cohort. The model predictions were generated by ran- 325  
domly drawing 100 samplings from the posterior distributions and simulating the Markov 326  
model for each sampled parameter set. We focused on the CST frequency as the outcome 327  
of interest. 328

## Acknowledgments 329

The authors thank Olivier Supplison for his helpful feedback. They acknowledge the ISO 330  
9001 certified IRD i-Trop HPC (member of the South Green Platform) at IRD Montpellier 331  
for providing HPC resources that have contributed to the research results reported within 332  
this article ([bioinfo.ird.fr](http://bioinfo.ird.fr) and [www.southgreen.fr](http://www.southgreen.fr)). 333

DNA extracts were (partly) performed through the genotyping and sequencing facilities 334



of ISEM (Institut des Sciences de l'Evolution-Montpellier) and Labex Centre Méditerranéen 335  
Environnement Biodiversité. 336  
The raw data and R scripts used will be shared upon publication. 337

## References 338

- [1] van de Wijkert JHHM. The vaginal microbiome and sexually transmitted infec- 339  
tions are interlinked: Consequences for treatment and prevention. PLoS Medicine. 340  
2017;14(12):e1002478. 341
- [2] Haahr T, Zacho J, Bräuner M, Shathmigha K, Skov Jensen J, Humaidan P. Repro- 342  
ductive outcome of patients undergoing in vitro fertilisation treatment and diagnosed 343  
with bacterial vaginosis or abnormal vaginal microbiota: a systematic PRISMA review 344  
and meta-analysis. BJOG. 2019;126(2):200–207. 345
- [3] Bilardi JE, Walker S, Temple-Smith M, McNair R, Mooney-Somers J, Bellhouse C, 346  
et al. The Burden of Bacterial Vaginosis: Women's Experience of the Physical, Emo- 347  
tional, Sexual and Social Impact of Living with Recurrent Bacterial Vaginosis. PLoS 348  
ONE. 2013;8(9):e74378. 349
- [4] Ravel J, Gajer P, Abdo Z, Schneider GM, Koenig SSK, McCulle SL, et al. Vaginal 350  
microbiome of reproductive-age women. Proc Nat Acad Sci USA. 2011;108(S1):4680– 351  
4687. 352

- [5] France MT, Fu L, Rutt L, Yang H, Humphrys MS, Narina S, et al. Insight into the 353  
ecology of vaginal bacteria through integrative analyses of metagenomic and meta- 354  
transcriptomic data. *Genome Biology*. 2022;23(1):66. 355
- [6] McKinnon LR, Achilles SL, Bradshaw CS, Burgener A, Crucitti T, Fredricks DN, 356  
et al. The Evolving Facets of Bacterial Vaginosis: Implications for HIV Transmission. 357  
*AIDS Research and Human Retroviruses*. 2019;35(3):219–228. 358
- [7] Holm JB, France MT, Gajer P, Ma B, Brotman RM, Shardell M, et al. Integrating 359  
compositional and functional content to describe vaginal microbiomes in health and 360  
disease. *Microbiome*. 2023;11(1):259. 361
- [8] Cancelo-Hidalgo MJ, Coello LB. Genitourinary Syndrome of the Menopause: Vaginal 362  
Health and Microbiota. In: Cano A, editor. *Menopause: A Comprehensive Approach*. 363  
Cham; 2017. p. 91–107. 364
- [9] Gajer P, Brotman RM, Bai G, Sakamoto J, Schutte UME, Zhong X, et al. Tem- 365  
poral Dynamics of the Human Vaginal Microbiota. *Science Translational Medicine*. 366  
2012;4(132):132ra52–132ra52. 367
- [10] DiGiulio DB, Callahan BJ, McMurdie PJ, Costello EK, Lyell DJ, Robaczewska A, 368  
et al. Temporal and spatial variation of the human microbiota during pregnancy. 369  
*Proceedings of the National Academy of Sciences*. 2015;112(35):11060–11065. 370

- [11] Serrano MG, Parikh HI, Brooks JP, Edwards DJ, Arodz TJ, Edupuganti L, et al. 371  
Racioethnic diversity in the dynamics of the vaginal microbiome during pregnancy. 372  
Nature medicine. 2019;25(6):1001–1011. 373
- [12] Munoz A, Hayward MR, Bloom SM, Rocafort M, Ngcapu S, Mafunda NA, et al. 374  
Modeling the temporal dynamics of cervicovaginal microbiota identifies targets that 375  
may promote reproductive health. Microbiome. 2021;9(1):1–12. 376
- [13] Chaban B, Links MG, Jayaprakash TP, Wagner EC, Bourque DK, Lohn Z, et al. 377  
Characterization of the vaginal microbiota of healthy Canadian women through the 378  
menstrual cycle. Microbiome. 2014;2:1–12. 379
- [14] Brooks JP, Buck GA, Chen G, Diao L, Edwards DJ, Fettweis JM, et al. Changes 380  
in vaginal community state types reflect major shifts in the microbiome. Microbial 381  
ecology in health and disease. 2017;28(1):1303265. 382
- [15] Ma B, Forney LJ, Ravel J. Vaginal Microbiome: Rethinking Health and Disease. 383  
Annual Review of Microbiology. 2012 Oct;66(1):371–389. Available from: [http://](http://www.annualreviews.org/doi/10.1146/annurev-micro-092611-150157) 384  
[www.annualreviews.org/doi/10.1146/annurev-micro-092611-150157](http://www.annualreviews.org/doi/10.1146/annurev-micro-092611-150157). 385
- [16] Hutchinson KB, Kip KE, Ness RB. Condom use and its association with bacterial 386  
vaginosis and bacterial vaginosis-associated vaginal microflora. Epidemiology. 2007;p. 387  
702–708. 388

- [17] Yotebieng M, Turner AN, Hoke TH, Van Damme K, Rasolofomanana JR, Behets F. 389  
Effect of consistent condom use on 6-month prevalence of bacterial vaginosis varies by 390  
baseline BV status. *Tropical Medicine & International Health*. 2009;14(4):480–486. 391
- [18] Borgdorff H, Veer Cvd, Houdt Rv, Alberts CJ, Vries HJd, Bruisten SM, et al. The 392  
association between ethnicity and vaginal microbiota composition in Amsterdam, the 393  
Netherlands. *PLoS ONE*. 2017;12(7):e0181135. 394
- [19] Zhou X, Brown CJ, Abdo Z, Davis CC, Hansmann MA, Joyce P, et al. Differences 395  
in the composition of vaginal microbial communities found in healthy Caucasian and 396  
black women. *ISME J*. 2007;1(2):121–133. 397
- [20] Fettweis JM, Brooks JP, Serrano MG, Sheth NU, Girerd PH, Edwards DJ, et al. Dif- 398  
ferences in vaginal microbiome in African American women versus women of European 399  
ancestry. *Microbiology*. 2014;160(Pt 10):2272. 400
- [21] France M, Ma B, Ravel J. Persistence and In Vivo Evolution of Vaginal Bacterial 401  
Strains over a Multiyear Time Period. *mSystems*. 2022 Nov;0(0):e00893–22. Publisher: 402  
American Society for Microbiology. Available from: [https://journals.asm.org/](https://journals.asm.org/doi/10.1128/msystems.00893-22) 403  
[doi/10.1128/msystems.00893-22](https://journals.asm.org/doi/10.1128/msystems.00893-22). 404
- [22] Brotman RM, Ravel J, Bavoil PM, Gravitt PE, Ghanem KG. Microbiome, sex hor- 405  
mones, and immune responses in the reproductive tract: Challenges for vaccine devel- 406  
opment against sexually transmitted infections. *Vaccine*. 2014;32(14):1543–1552. 407

- [23] Beneteau T, Groc S, Murall CL, Boué V, Elie B, Tessandier N, et al.. HPV detection 408  
patterns in young women from the PAPCLEAR longitudinal study: implications for 409  
HPV screening policies. medRxiv; 2023. Available from: [https://www.medrxiv.org/](https://www.medrxiv.org/content/10.1101/2023.09.30.23296382v1) 410  
[content/10.1101/2023.09.30.23296382v1](https://www.medrxiv.org/content/10.1101/2023.09.30.23296382v1). 411
- [24] Murall CL, Rahmoun M, Selinger C, Baldellou M, Bernat C, Bonneau M, et al. 412  
Natural history, dynamics, and ecology of human papillomaviruses in genital in- 413  
fections of young women: protocol of the PAPCLEAR cohort study. *BMJ Open*. 414  
2019;9(6):e025129. 415
- [25] Frank JA, Reich CI, Sharma S, Weisbaum JS, Wilson BA, Olsen GJ. Critical Evalua- 416  
tion of Two Primers Commonly Used for Amplification of Bacterial 16S rRNA Genes. 417  
*Appl Environ Microbiol*. 2008;74(8):2461. 418
- [26] France MT, Ma B, Gajer P, Brown S, Humphrys MS, Holm JB, et al. VALENCIA: 419  
a nearest centroid classification method for vaginal microbial communities based on 420  
composition. *Microbiome*. 2020;8(1):166. 421
- [27] Gelman A. Scaling regression inputs by dividing by two standard deviations. *Statistics* 422  
in medicine. 2008;27(15):2865–2873. 423
- [28] Christopher H Jackson. Multi-State Models for Panel Data: The msm Package for R. 424  
*Journal of Statistical Software*. 2011;38(8):1–29. 425

- [29] Stan Development Team. Stan Functions Reference; 2023. Accessed: 2024-02-24. 426  
Available from: <https://mc-stan.org/docs/functions-reference/index.html>. 427
- [30] Stan Development Team. Prior Choice Recommendations; 2023. Accessed: 2024-02- 428  
15. <https://github.com/stan-dev/stan/wiki/Prior-Choice-Recommendations>. 429
- [31] Piironen J, Vehtari A. Sparsity information and regularization in the horseshoe and 430  
other shrinkage priors. *Electronic Journal of Statistics*. 2017;11(2):5018–5051. 431
- [32] Stan Development Team. RStan: the R interface to Stan; 2023. R package version 432  
2.32.3. Available from: <https://mc-stan.org/>. 433
- [33] van Buuren S, Groothuis-Oudshoorn K. mice: Multivariate Imputation by Chained 434  
Equations in R. *Journal of Statistical Software*. 2011;45(3):1–67. 435
- [34] Stan Development Team. The Stan Core Library; 2018. Version 2.18.0. Available 436  
from: <http://mc-stan.org/17>. 437
- [35] Betancourt M. Towards a principled Bayesian workflow; 2020. 438
- [36] Farage M, Maibach H. Lifetime changes in the vulva and vagina. *Archives of gyne-* 439  
*cology and obstetrics*. 2006;273:195–202. 440
- [37] Loganantharaj N, Nichols WA, Bagby GJ, Volaufova J, Dufour J, Martin DH, et al. 441  
The effects of chronic binge alcohol on the genital microenvironment of simian im- 442

- munodeficiency virus-infected female rhesus macaques. *AIDS research and human retroviruses*. 2014;30(8):783–791. 443  
444
- [38] Mayer BT, Srinivasan S, Fiedler TL, Marrazzo JM, Fredricks DN, Schiffer JT. Rapid 445  
and profound shifts in the vaginal microbiota following antibiotic treatment for bac- 446  
terial vaginosis. *The Journal of infectious diseases*. 2015;212(5):793–802. 447
- [39] Si J, You HJ, Yu J, Sung J, Ko G. Prevotella as a hub for vaginal microbiota under 448  
the influence of host genetics and their association with obesity. *Cell host & microbe*. 449  
2017;21(1):97–105. 450
- [40] Ravel J, Gajer P, Abdo Z, Schneider GM, Koenig SS, McCulle SL, et al. Vaginal 451  
microbiome of reproductive-age women. *Proceedings of the National Academy of* 452  
*Sciences*. 2011;108(supplement\_1):4680–4687. 453
- [41] Brotman RM, He X, Gajer P, Fadrosh D, Sharma E, Mongodin EF, et al. Association 454  
between cigarette smoking and the vaginal microbiota: a pilot study. *BMC infectious* 455  
*diseases*. 2014;14(1):1–11. 456
- [42] Achilles SL, Austin MN, Meyn LA, Mhlanga F, Chirenje ZM, Hillier SL. Impact of 457  
contraceptive initiation on vaginal microbiota. *American journal of obstetrics and* 458  
*gynecology*. 2018;218(6):622–e1. 459
- [43] Laniewski P, Owen KA, Khnanisho M, Brotman RM, Herbst-Kralovetz MM. Clinical 460  
and personal lubricants impact the growth of vaginal lactobacillus species and colo- 461

- nization of vaginal epithelial cells: an in vitro study. *Sexually transmitted diseases.* 462  
2021;48(1):63–70. 463
- [44] Tessandier N, Uysal IB, Elie B, Selinger C, Bernat C, Boué V, et al. Does exposure 464  
to different menstrual products affect the vaginal environment? *Molecular Ecology.* 465  
2023;32(10):2592–2601. 466
- [45] Vodstrcil LA, Twin J, Garland SM, Fairley CK, Hocking JS, Law MG, et al. The 467  
influence of sexual activity on the vaginal microbiota and *Gardnerella vaginalis* clade 468  
diversity in young women. *PLOS One.* 2017;12(2):e0171856. 469
- [46] Noormohammadi M, Eslamian G, Kazemi SN, Rashidkhani B. Association between 470  
dietary patterns and bacterial vaginosis: a case–control study. *Scientific Reports.* 471  
2022;12(1):12199. 472
- [47] Pape K, Ryttergaard L, Rotevatn TA, Nielsen BJ, Torp-Pedersen C, Overgaard C, 473  
et al. Leisure-time physical activity and the risk of suspected bacterial infections. 474  
*Medicine and science in sports and exercise.* 2016;48(9):1737–1744. 475
- [48] Amabebe E, Anumba DO. Psychosocial stress, cortisol levels, and maintenance of 476  
vaginal health. *Frontiers in endocrinology.* 2018;p. 568. 477
- [49] Klebanoff MA, Nansel TR, Brotman RM, Zhang J, Yu KF, Schwebke JR, et al. 478  
Personal hygienic behaviors and bacterial vaginosis. *Sexually transmitted diseases.* 479  
2010;37(2):94. 480



- [50] Van Kessel K, Assefi N, Marrazzo J, Eckert L. Common complementary and alternative therapies for yeast vaginitis and bacterial vaginosis: a systematic review. *Obstetrical & gynecological survey*. 2003;58(5):351–358.
- [51] Ma ZS. Microbiome transmission during sexual intercourse appears stochastic and supports the red queen hypothesis. *Frontiers in Microbiology*. 2022;12:789983.
- [52] Juliana NC, Peters RP, Al-Nasiry S, Budding AE, Morr  SA, Ambrosino E. Composition of the vaginal microbiota during pregnancy in women living in sub-Saharan Africa: a PRISMA-compliant review. *BMC pregnancy and childbirth*. 2021;21(1):1–15.
- [53] Gupta K, Hillier SL, Hooton TM, Roberts PL, Stamm WE. Effects of contraceptive method on the vaginal microbial flora: a prospective evaluation. *The Journal of infectious diseases*. 2000;181(2):595–601.
- [54] Brotman RM, Klebanoff MA, Nansel TR, Andrews WW, Schwebke JR, Zhang J, et al. A longitudinal study of vaginal douching and bacterial vaginosis—a marginal structural modeling analysis. *American journal of epidemiology*. 2008;168(2):188–196.
- [55] Team SD. Stan Functions Reference; 2024. Accessed: 2024-02-05. <https://mc-stan.org/docs/functions-reference>.

## Supplementary methods 497

### Competing interests 498

JReynes reports personal fees from Gilead (consulting and payment or honoraria for lectures, presentations, speaker's bureaus, manuscript writing, or educational events), Janssen (payment or honoraria for lectures, presentations, speaker's bureaus, manuscript writing, or educational events), Merck (payment or honoraria for lectures, presentations, speaker's bureaus, manuscript writing, or educational events), Theratechnologies (payment or honoraria for lectures, presentations, speaker's bureaus, manuscript writing, or educational events), and ViiV Healthcare (consulting and payment or honoraria for lectures, presentations, speaker's bureaus, manuscript writing, or educational events) and support for attending meetings and/or travel from Gilead and Pfizer, outside of the submitted work. 509

JRavel is co-founder of LUCA Biologics, a biotechnology company focusing on translating microbiome research into live biotherapeutics drugs for women's health. He is Editor-in-Chief at *Microbiome*. 510

All the other authors do not report any conflict of interest. 511

### Ethics 512

The PAPCLEAR study was promoted by the CHU of Montpellier (France). This study has been approved by the Comité de Protection des Personnes (CPP) Sud Méditerranée I (reference number 2016-A00712-49); by the Comité Consultatif sur le Traitement de 513  
514  
515

l'Information en matière de Recherche dans le domaine de la Santé (reference number 516  
16.504); by the Commission Nationale Informatique et Libertés (reference number MMS/ 517  
ABD/ AR1612278, decision number DR-2016-488), by the Agence Nationale de Sécurité 518  
du Médicament et des Produits de Santé (reference 20160072000007), and is registered at 519  
ClinicalTrials.gov under the ID NCT02946346. 520

## **Funding** 521

This project has received funding from the European Research Council (ERC) under the 522  
European Union's Horizon 2020 research and innovation programme (grant agreement No 523  
648963, to SA). The authors acknowledge further support from the Fondation pour la 524  
Recherche Medicale (to TK), the Agence Nationale de la Recherche contre le SIDA (ANRS- 525  
MIE, to NT and OS), and the MemoLife Labex (to BE). 526

## **S1: Description of the study covariates** 527

*1st menstr.* Number of years since the first menstruation: The morphology of the human vagina 528  
changes throughout the life of a woman and the onset of puberty marks a key event 529  
that triggers cascading changes [36]. 530

*Alcohol* Average number of glasses of alcoholic drinks consumed per week: Chronic presence 531  
of alcohol in the genital environment has been linked to a shift in the immune and 532  
microbiological conditions [37]. 533

|                      |                                                                                       |     |
|----------------------|---------------------------------------------------------------------------------------|-----|
| <i>Antibiotics</i>   | Consumption of antibiotics during the study: The bacterial composition responds       | 534 |
|                      | rapidly and transiently to antibiotics treatments that target bacteria either broadly | 535 |
|                      | or with a narrow taxonomic scale [38].                                                | 536 |
| <i>BMI</i>           | Body mass index (BMI): Obesity has been implicated in elevating vaginal microbiota    | 537 |
|                      | diversity and promoting <i>Prevotella</i> associated with bacterial vaginosis [39].   | 538 |
| <i>Caucasian</i>     | Identity as Caucasian ethnicity: Ethnicity has been linked to variation in vaginal    | 539 |
|                      | microbiota compositions in several studies [40]. However, causal mechanisms remain    | 540 |
|                      | an open question.                                                                     | 541 |
| <i>Cigarettes</i>    | Cigarette smoking: Smoking has been implicated in the development of BV due to its    | 542 |
|                      | anti-estrogenic effects and the presence of harmful substances such as benzo[a]pyrene | 543 |
|                      | diol epoxide (BPDE). [41].                                                            | 544 |
| <i>Horm. contra.</i> | Use of hormonal contraception during the study: The vaginal hormonal landscape is     | 545 |
|                      | affected by the use of hormonal contractions [42].                                    | 546 |
| <i>Lubricant</i>     | Use of lubricant during the study: Personal lubricants contain various chemicals that | 547 |
|                      | differentially impact the growth of vaginal microbes in-vitro [43].                   | 548 |
| <i>Menstr. cup</i>   | Use of menstrual cup during the study: The vaginal microenvironmental may be          | 549 |
|                      | altered by the use of menstrual cups both physically and chemically. An elevated      | 550 |
|                      | risk of fungal infections has been reported [44].                                     | 551 |

*Partners* Cumulative number of sexual partners: The genital microbiome can be transferred 552  
between sexual partners [45]. Such an external input could destabilise the resident 553  
community. 554

*Red meat* Average number of meals that include red meat consumption per week: Diet alters 555  
the vaginal environment for microbes. An unhealthy diet, linked to a high proportion 556  
of red meat consumption, has been linked to an elevated risk of BV [46]. 557

*Regular condom* Regular use of condoms during sexual intercourse: Condom use can modify the vagi- 558  
nal microenvironment by altering the exchange of microbes between partners [16]. 559

*Regular sport* Engaging in regular sporting activities, over 50% of the time: Physical activities 560  
influence immune responses, with leisure-time physical activity associated with a 561  
reduced risk of suspected bacterial infections compared to sedentary behaviour [47]. 562

*Stress* Average stress level reported from 0 (min) to 3 (max): Stress hormones may disrupt 563  
vaginal flora, for instance, by inhibiting glycogen production, which is the primary 564  
fuel for lactobacilli [48]. 565

*Tampon* Use of tampons during the study: The use of internal contraceptives like tampons 566  
directly alters the vaginal environment, although negative effects from tampon use 567  
are seldom reported [49]. 568

*Vag. product* Use of vaginal cream/tablet/capsule/gel/wipe during the study: Women frequently 569  
use over-the-counter vulvovaginal treatments that contain a variety of chemical com- 570

|                        |                                                                                           |     |
|------------------------|-------------------------------------------------------------------------------------------|-----|
|                        | ponents. However, the clinical effectiveness of these products in preventing bacterial    | 571 |
|                        | vaginosis (BV) is seldom systematically evaluated [50].                                   | 572 |
| <i>Chlamydia</i>       | Tested positive for chlamydia                                                             | 573 |
| <i>Female affinity</i> | Affinity to female: Genital microbiome transfers during sexual activity are anticipated   | 574 |
|                        | to vary based on the genders of the partners [51]                                         | 575 |
| <i>Male affinity</i>   | Affinity to male: Genital microbiome transfers during sexual activity are anticipated     | 576 |
|                        | to vary based on the genders of the partners [51]                                         | 577 |
| <i>Pregnancy</i>       | History of pregnancy: Pregnancy significantly changes the cervicovaginal environ-         | 578 |
|                        | ment, with increased estrogen from the ovaries and placenta leading to higher vaginal     | 579 |
|                        | glycogen. This supports the growth of <i>Lactobacillus</i> species [52].                  | 580 |
| <i>Spermicide</i>      | Use of spermicide during study: Spermicides use chemicals to prevent sperm from           | 581 |
|                        | reaching an egg, but their use can change vaginal microflora, potentially increasing      | 582 |
|                        | the risk of genitourinary infections [53].                                                | 583 |
| <i>Vag. douching</i>   | Use of vaginal douching during study: Vaginal douching, the practice of washing in-       | 584 |
|                        | side the vagina with a liquid solution, has been shown to increase the risk of disturbing | 585 |
|                        | the natural balance of vaginal flora [54].                                                | 586 |

## Supplementary Results

587

### S2: Pairwise correlations between covariates

588

There were no strong correlations among covariates, with the strongest correlation found

589

between BMI and stress ( $r = 0.41$ ).

590

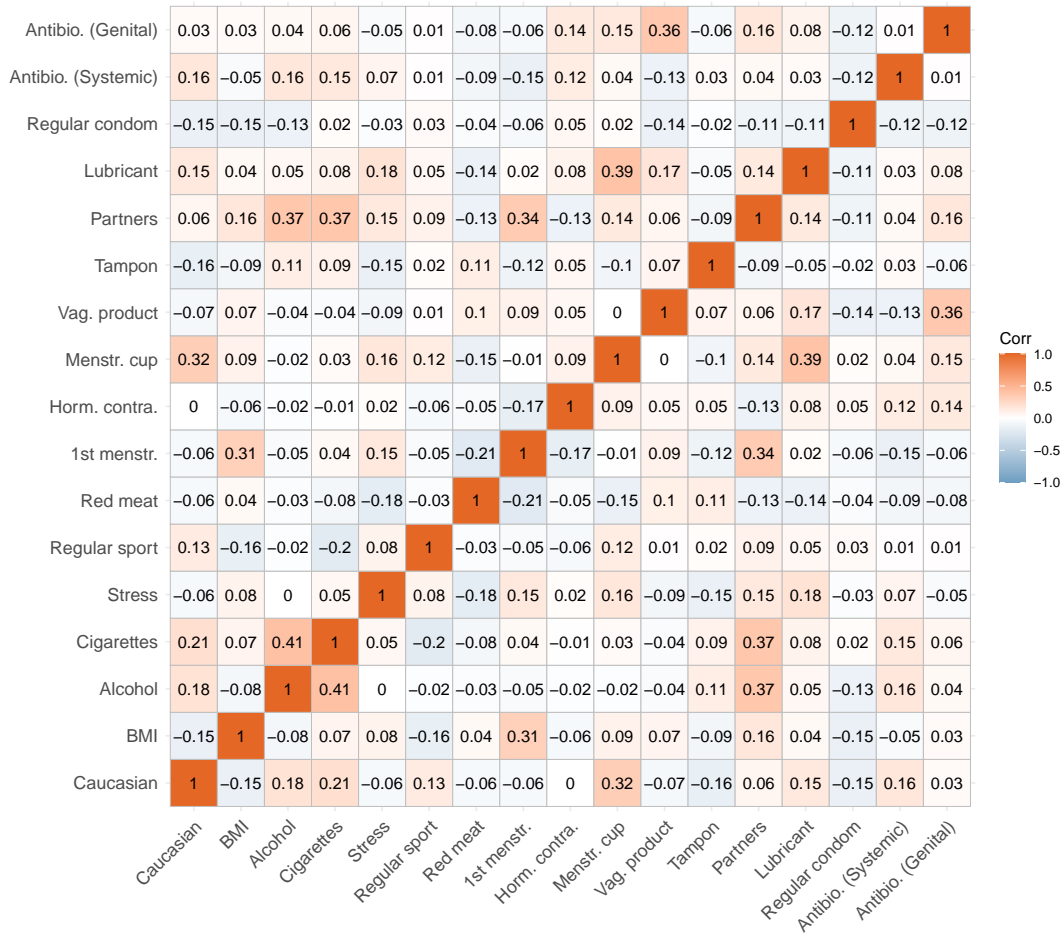

**Figure S1: Correlation between covariates.** Pairwise Pearson's correlation coefficients between covariates



### S3: Assessment of posterior accuracy, precision and prior contraction

591

We leveraged the properties of posterior distributions to identify potential model fitting problems that might manifest from our model assumptions. To examine the accuracy and precision of posterior distributions, we first generated simulated observations based on the estimated posterior mean parameters. We then refitted our model to the simulated observations (i.e., secondary fitting) to compute the posterior z-score for each parameter, which measures how closely the posterior recovers the parameters of the data generating process [35]:

$$z = \frac{\mathbb{E}_{\text{sim}} - \mathbb{E}_{\text{post}}}{\sigma_{\text{sim}}},$$

where  $\mathbb{E}_{\text{post}}$  denotes the posterior mean of the fit to the actual data that we consider the ‘true’ parameter.  $\mathbb{E}_{\text{sim}}$  and  $\sigma_{\text{sim}}$  denote the mean and standard deviation of the posterior distribution of the secondary fitting. The smaller the z-score, the closer the bulk of the posterior is to the true parameter [35]. In contrast, large z-values may be indicative of overfitting and, or poor prior specifications [35].

To examine the influence of the likelihood function in relation to prior information, we computed the posterior contraction,  $k$ :

$$k = 1 - \frac{\sigma_{\text{post}}^2}{\sigma_{\text{prior}}^2}$$

where  $\sigma_{\text{post}}^2$  and  $\sigma_{\text{prior}}^2$  correspond to the variance of posterior and prior distributions, 597  
respectively. The  $k$  values close to zero indicate that data contain little information (i.e., 598  
rendering priors strongly informative). Conversely, values close to 1 indicate that data are 599  
much more informative than the prior [35]. 600

We found that the most of our model parameters and hyperparameters — were esti- 601  
mated with accuracy and precision and identifiability, with the absolute posterior z-scores 602  
below three (Fig. S1). A small number of individual variation in transition rates,  $sd_s$  603  
showed a tendency towards overfitting (the absolute posterior z-scores above three). Thus, 604  
caution might be warranted when interpreting the extent of between-women variation in 605  
CST transition rates, a small number of z-scores exceeding the absolute number of three 606  
is unlikely to be a cause of concern [35]. We found that the posterior distributions for 607  
covariate coefficients,  $\beta$ , contracted by over 75% compared to the prior distribution, for all 608  
but one covariate effect, meaning that the covariate coefficients were well-identified from 609  
data (Fig. S1). Although we used generic priors recommended by Stan [55], the  $L_s$  param- 610  
eters that define correlations among between-woman variation showed limited posterior 611  
contraction (i.e.,  $\leq \sim 0.25$ ), indicating that these parameters are poorly informed by data. 612  
As such, we refrain from making biological inferences about these correlations. 613

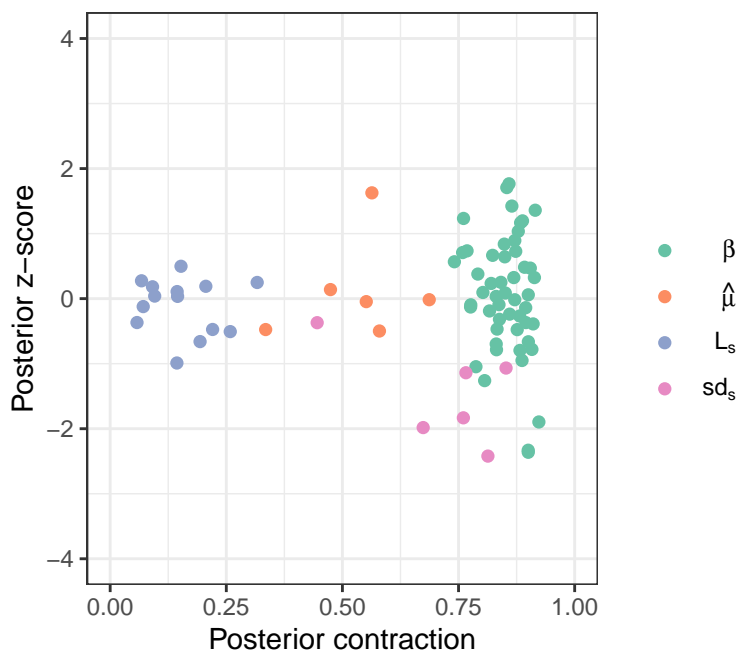

**Figure S2: Accuracy, precision and identifiability of estimated parameters.** Posterior z-score (y-axis) measures how closely the posterior recovers the parameters of the true data-generating process and posterior contraction (x-axis) evaluates the influence of the likelihood function over the prior, respectively. Smaller absolute posterior z-scores indicate that the posterior accurately recovers the parameters of the data-generating process: the absolute value beyond three to four may indicate substantial bias [35]. The posterior contraction values close to one indicate that data are much more informative than the prior. The estimated parameters are represented by a filled dot.

**S4: Predicted difference in community state type (CST) prevalence at various counterfactual scenarios.**

Our counterfactual simulations predicted that alcohol consumption and the number of partners are factors that impact the population-level outcome in terms of the prevalence of different community state types.

The prevalence of the optimal community (CST I (II, V)) in a counterfactual population comprising the heaviest drinkers was predicted to be 37% lower than that of non-drinkers (with >99% certitude) (Fig. S??). The prevalence difference of the sub-optimal and non-optimal communities in the same comparisons was an increase of 22% (98% certitude) and 16% (84% certitude), respectively. Similar comparisons between the populations of heaviest drinkers and average drinkers yielded a reduction of 20% in the optimal communities (>99% certitude) and the population of average drinkers versus non-drinkers predicted a 17% lower prevalence of the optimal communities.

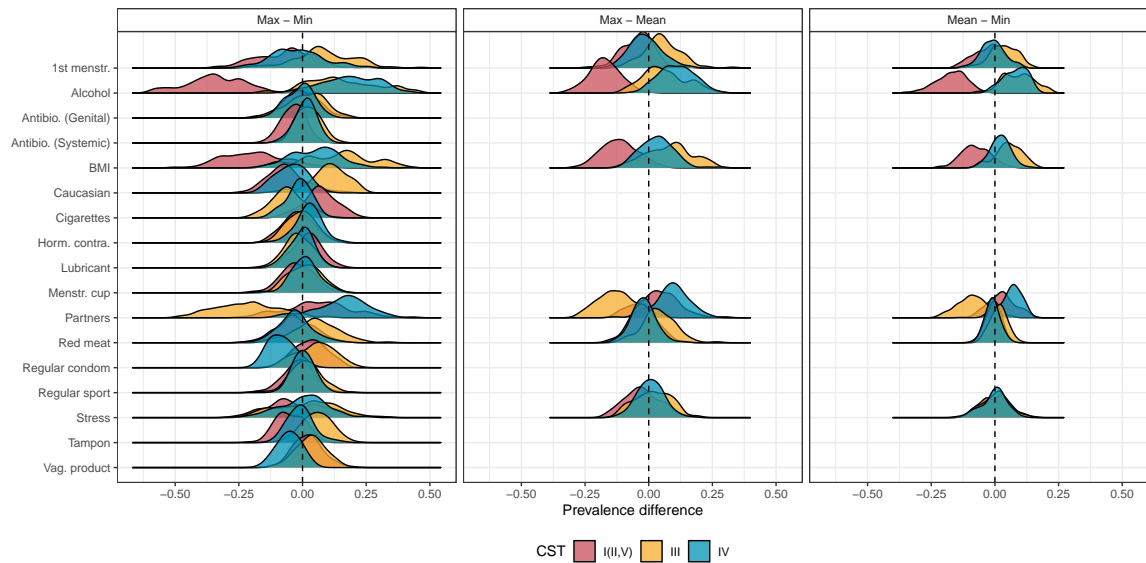

**Figure S2: Difference in community state type (CST) prevalence at predicted various counterfactual scenarios.** The differences were calculated from posterior samples simulated at 0 and 1 for binary variables and at the population maximum and minimum values recorded by the PAPCLEAR for continuous variables (left panel). Additional differences were computed between the population maximum and mean (middle panel) and the population mean and minimum for continuous variables (right panel).
